# Supplementary material
Source: PubMed Central journal article supplement (PMC2117875)
Supplement: jnnpsyc_78_9_1012__1.pdf [file jnnpsyc_78_9_1012__1.pdf]

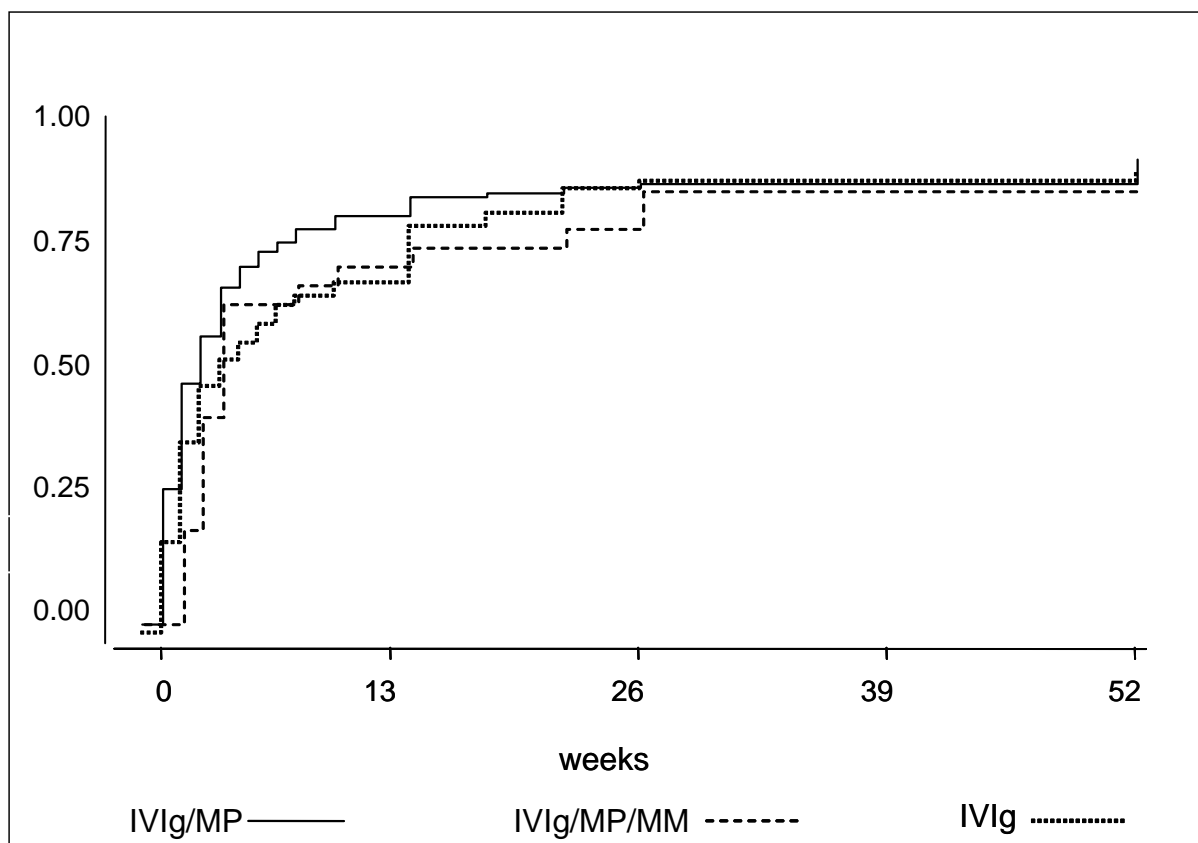

**Figure 1a** Kaplan-Meier curves indicating the proportion of patients that has improved 1 or more grades on the GBS disability score during 52 weeks of follow-up

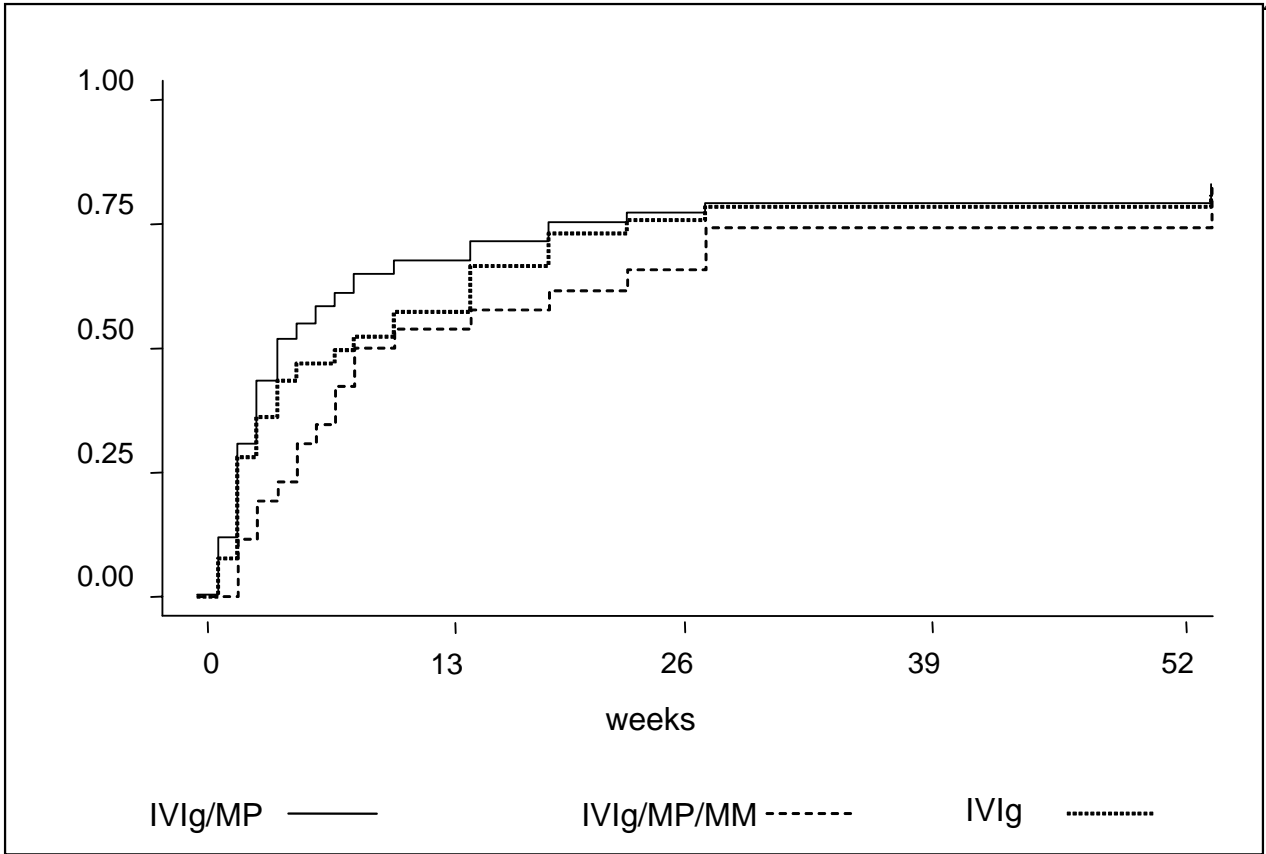

**Figure 1b** Kaplan-Meier survival estimates for the proportion of patients that has improved to independent walking (GBS disability  $\leq 2$ ) during 52 weeks of follow-up

**Table 2** Secondary endpoints

| <b>Endpoint</b>                                                                                                   | <b>IVIg/MP/MM<br/>(n=26)</b> | <b>IVIg/MP<sup>2</sup><br/>(n=112)</b> | <b>P-value</b> |
|-------------------------------------------------------------------------------------------------------------------|------------------------------|----------------------------------------|----------------|
| <b>Percentage of patients able to walk independently after 8 weeks (GBS disability score <math>\leq 2</math>)</b> | 12 (52%)                     | 78 (70%)                               | P=0.12         |
| <b>Median time to independent walking (GBS disability score <math>\leq 2</math>) *</b>                            | 70 days                      | 28 days                                | P=0.22         |
| <b>Median time to improve <math>\geq 1</math> grade on GBS disability scale *</b>                                 | 28 days                      | 21 days                                | P=0.08         |
| <b>Improvement <math>\geq 1</math> grade on GBS disability scale after 6 months (%)</b>                           | 21 (84%)                     | 90 (93%)                               | P=0.17         |
| <b>Need for artificial respiration</b>                                                                            | 4 (15%)                      | 22 (21%)                               | P=0.5          |

\* see also figure 1a and 1b (website JNNP).

**Table 3 Adverse events**

| <b>Event</b>                        | <b>IVIg + MP + MM</b> |                      |                           | <b>IVIg + MP</b>           |
|-------------------------------------|-----------------------|----------------------|---------------------------|----------------------------|
|                                     | 0 - 6 weeks<br>(n=26) | 7-26 weeks<br>(n=26) | <b>Overall<br/>(n=26)</b> | <b>overall<br/>(n=112)</b> |
| <b>Urinary tract infection</b>      | 19%                   | 4%                   | <b>23%</b>                | <b>18%</b>                 |
| <b>Respiratory tract infection</b>  | 15%                   | 4%                   | <b>19%</b>                | <b>32%</b>                 |
| <b>Glucose &gt; 10 mmol/l</b>       | 19%                   | 0%                   | <b>19%</b>                | <b>21%</b>                 |
| <b>Haematological complication*</b> | 8%                    | 0%                   | <b>8%</b>                 | <b>n. a.</b>               |
| <b>Renal failure</b>                | 4%                    | 0%                   | <b>4%</b>                 | <b>3%</b>                  |
| <b>Deep venous thrombosis</b>       | 0%                    | 8%                   | <b>8%</b>                 | <b>5%</b>                  |
| <b>Pulmonary embolism</b>           | 0%                    | 4%                   | <b>4%</b>                 | <b>4%</b>                  |
| <b>Delirium</b>                     | 0%                    | 4%                   | <b>4%</b>                 | <b>5%</b>                  |
| <b>Gastro-intestinal bleeding</b>   | 0%                    | 4%                   | <b>4%</b>                 | <b>3%</b>                  |

\* leucopenia or anaemia
